# Supplementary material for: NIR-responsive nano-holed titanium alloy surfaces: a photothermally activated antimicrobial biointerface
Source: Royal Society of Chemistry journal article supplement (doi:10.1039/d4tb01307g), 2024-01-01
Supplement: d4tb01307g1.pdf [file d4tb01307g1.pdf]

## **NIR - responsive nano - holed titanium alloys surfaces: a photothermally activated antimicrobial biointerface**

Denise B. Pistonesi <sup>[a, §]</sup>, Federico Belén <sup>[a, §]</sup>, Juan M. Ruso <sup>[b]</sup>, M. Eugenia Centurión <sup>[a]</sup>,  
M. Gabriela Sica <sup>[c, d]</sup>, Marcelo F. Pistonesi <sup>[a]</sup>, and Paula V. Messina <sup>[a]\*</sup>

[a] Department of Chemistry, Universidad Nacional del Sur, INQUISUR – CONICET, B8000CPB, Bahía Blanca, Argentina. [b] Soft Matter and Molecular Biophysics Group, Department of Applied Physics and iMATUS, University of Santiago de Compostela, 15782 Santiago de Compostela, Spain. [c] Department of Biology, Biochemistry and Pharmacy, Universidad Nacional del Sur, B8000CPB, Bahía Blanca, Argentina. [d] Department of Health Sciences, Universidad Nacional del Sur, B8000CPB, Bahía Blanca, Argentina.

(\*) Author to whom correspondence should be addressed. Tel: +54 291 4595159. Fax: +54 291 4595160. Electronic mail: pmessina@uns.edu.ar.

(§) Denise B. Pistonesi and Federico Belén contributed equally to this work.

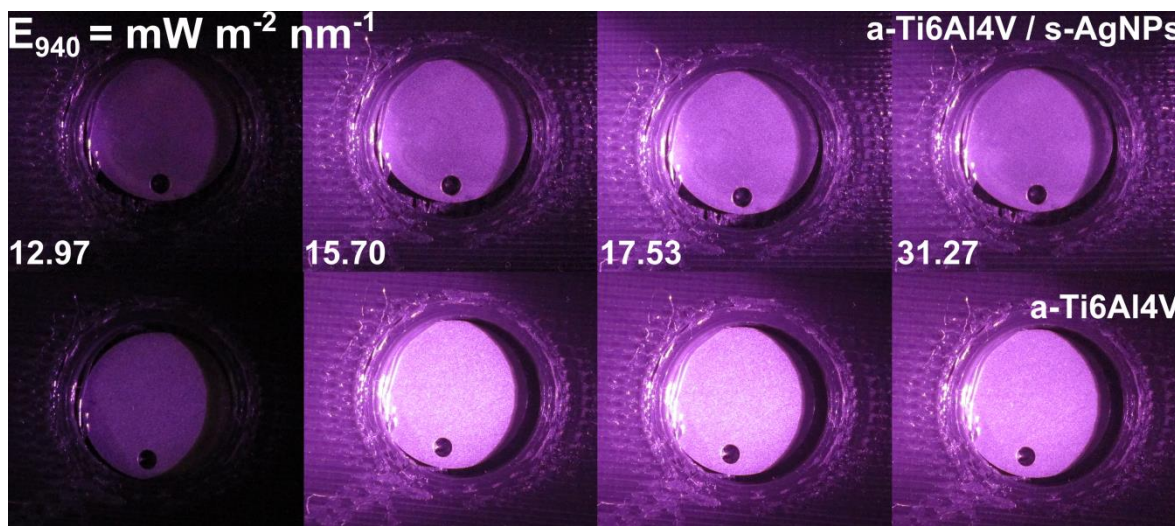

**Figure 1ESI.** Anodized Ti6Al4V discs immersed in sphere-like AgNPs reaction medium throughout 7h used as a second control (*a*-Ti6Al4V / *s*-AgNPs) compared to *a*-Ti6Al4V.

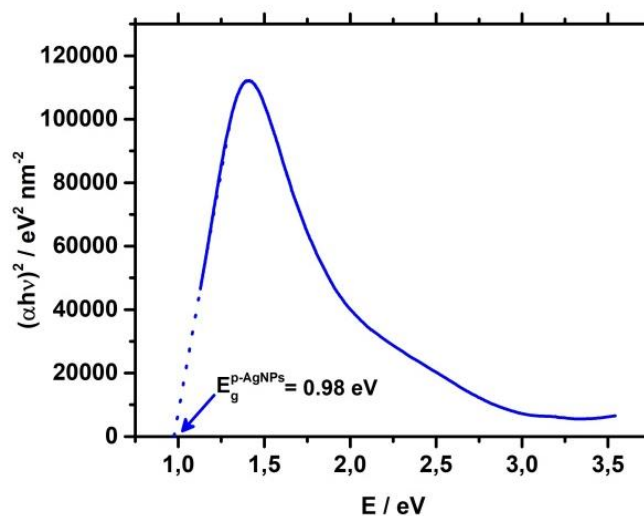

**Figure 2ESI.** Absorption coefficient,  $\alpha$ , was used to analyze the absorption edge for direct transitions in *p*-AgNPs.  $\alpha$  was computed as indicated Hassan et al.<sup>1</sup>

The shape and size of the nano-holed structure were interpreted in terms of their Feret's diameter ( $D_F$ ), Feret's angle ( $F_{ang}$ ), roundness ( $R$ ) and circularity ( $C$ ). Originally, *a*-Ti6Al4V, exhibits a uniform and regular distribution pattern along macro- and nano- scale levels. The oxide layer presents a homogeneous network of interconnected nano-pores, with a center-to-center distance of about  $35.5 \pm 2.2$  nm,  $TiO_2$  inter-void barriers of about  $7.2 \pm 0.6$  nm in their upper and of  $22.0 \pm 1.2$  nm in their basal diameter. Titania cavities have,

$28.5 \pm 2.1$  nm on their upper portion and  $15.2 \pm 0.9$  nm in their basal distance, given rise to the ratio between spacing and basal diameter of  $\approx 1.88$ .<sup>2</sup>

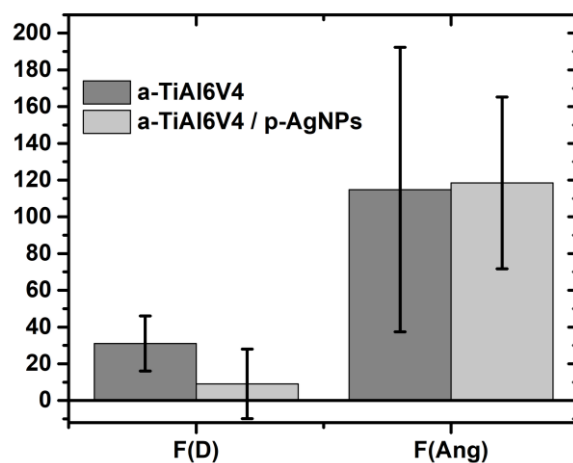

**Figure 3ESI.** Feret's diameter ( $D_F$ ) and Feret's angle ( $F_{ang}$ ) of original anodized Ti6Al4V sheets and of a-Ti6Al4V / p-Ag-NPs surfaces after immersion throughout 7 h in prism-shaped nanosilver reaction media.

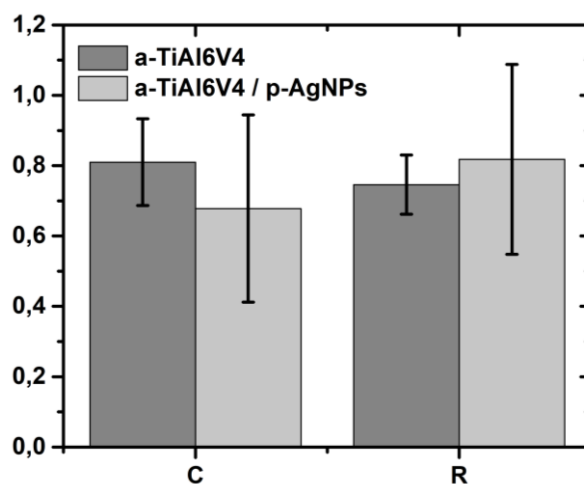

**Figure 4ESI.** Roundness (R) and circularity (C) of original anodized Ti6Al4V sheets and of a-Ti6Al4V / p-Ag-NPs surfaces after immersion throughout 7 h in prism-shaped nanosilver reaction media.

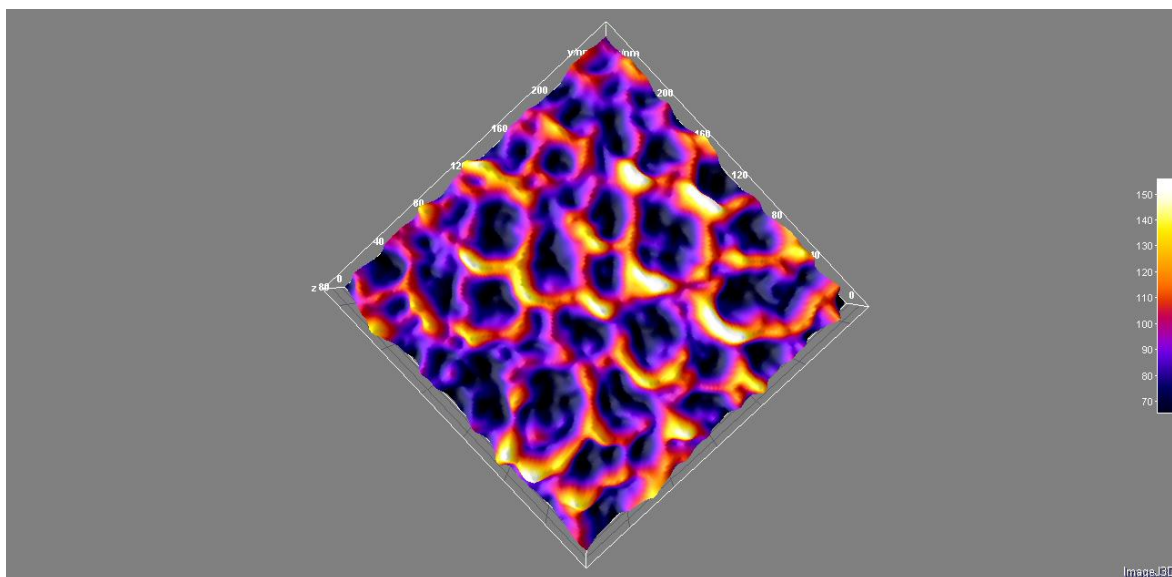

**Figure 5ESI.** 3D surface plot of a-Ti6Al4V / p-Ag-NPs substrate displaying the packing array of nano-holes after immersion throughout 7 h in prism-shaped nanosilver reaction media.

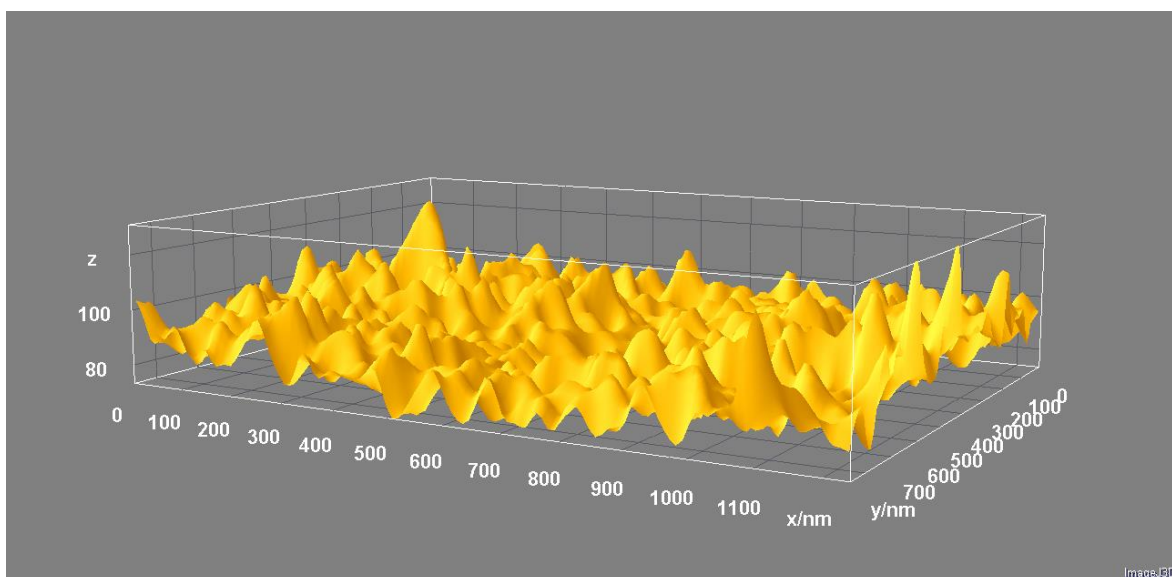

**Figure 6ESI.** Inverted colored 3D surface plot constructed from HR-SEM microphotograph of a-Ti6Al4V / p-Ag-NPs sheet after immersion throughout 7 h in prism-shaped nanosilver reaction media.

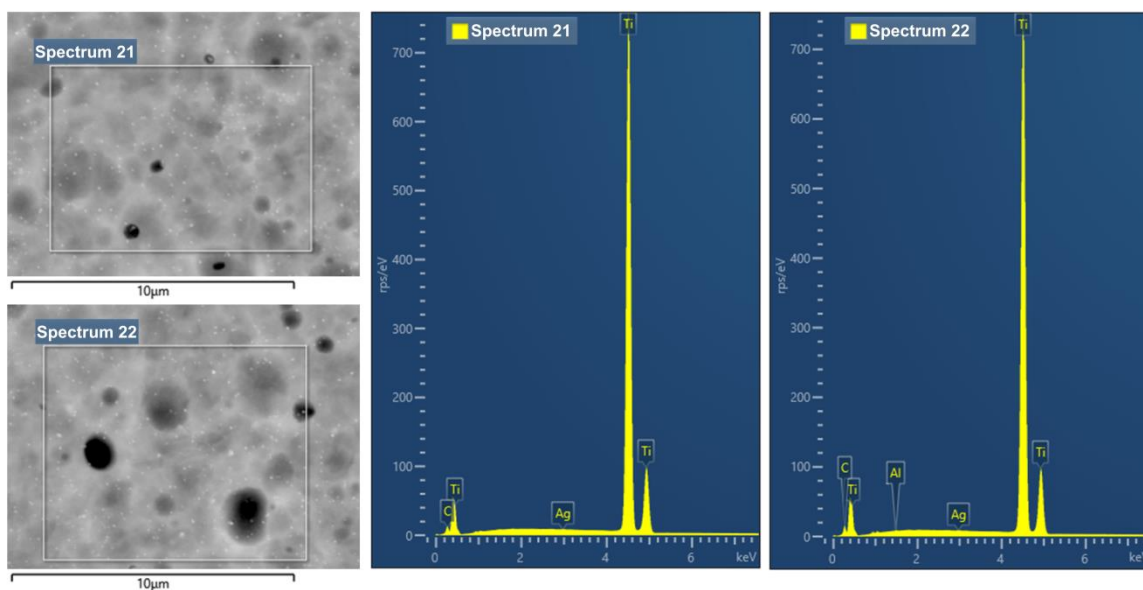

**Figure 7ESI.** EDX microanalysis of *a*-Ti6Al4V / *p*-Ag-NPs. (Spectrum 21) as obtained follows *in situ* generation procedure (7h) and (Spectrum 22) after their immersion in Milli Q water throughout 24 h.

| Wt.%        | C    | Ti    | Al   | Ag   |        |
|-------------|------|-------|------|------|--------|
| Spectrum 21 | 2.16 | 96.91 |      | 0.93 | 100.00 |
| Spectrum 22 | 2.55 | 96.46 | 0.04 | 0.95 | 100.00 |

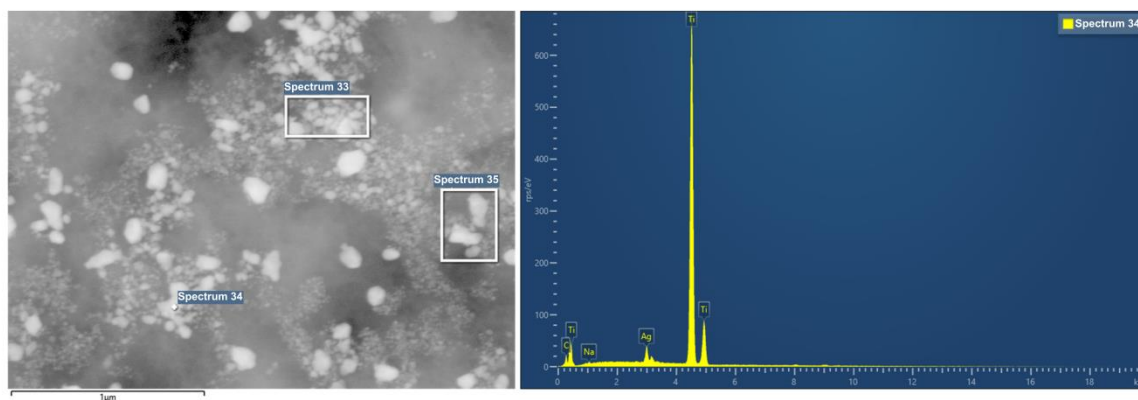

**Figure 8ESI.** EDX microanalysis of *p*-Ag-NPs clusters.

| Wt.%        | C    | Na   | Ti    | Ag   |        |
|-------------|------|------|-------|------|--------|
| Spectrum 33 | 3.97 | 0.34 | 92.81 | 2.88 | 100.00 |
| Spectrum 34 | 3.36 | 0.34 | 92.07 | 4.23 | 100.00 |
| Spectrum 35 | 3.29 | 0.28 | 94.95 | 1.48 | 100.00 |

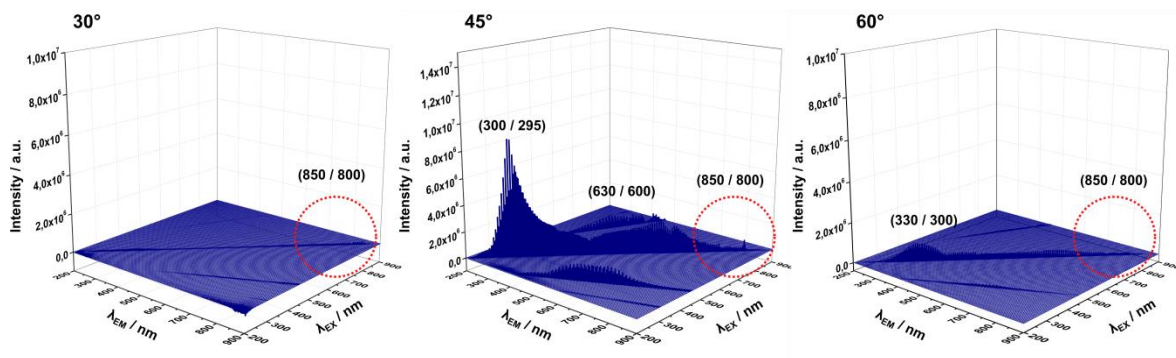

**Figure 9ESI.** 3D PL patterns recorded at 30, 45 and 60° of incident radiation Ti6Al4V / s-AgNPs surfaces. Bands indicated were expressed as ( $\lambda_{EM}$  /  $\lambda_{EX}$ ). Missing band at (850 / 800) was indicated in the red circle.

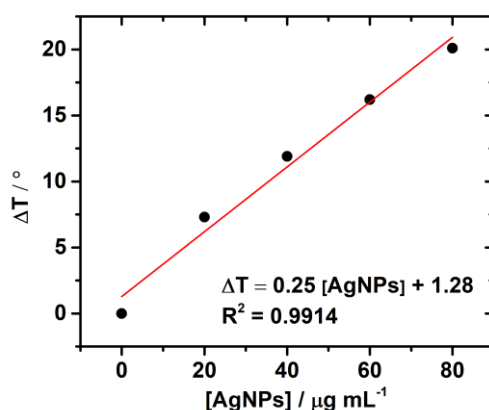

**Figure 10ESI.** Temperature increase after NIR plasmonic stimulation of different concentration prism-shaped AgNPs' dispersion.  $t = 600$  seconds of NIR laser irradiation at 904 nm ( $E = 83.6 \text{ mW cm}^{-2}$ )

**Table 1ESI.** Photothermal conversion efficiency,  $\eta$ , of prism-shaped AgNPs' dispersions ( $p$ -AgNPs) and  $\alpha$ -Ti6Al4V /  $p$ -AgNPs surfaces exited at 904 nm.

| $p$ - AgNPs                   | $T_{\max} / ^\circ\text{C}$ | $\tau_s / \text{s}$ | $hS / \text{mW } ^\circ\text{C}^{-1}$ | $T_{\max} - T_{\text{surr}} / ^\circ$ | $Q_{\text{dis}} / \text{mW}$ | $\eta / \%$ |
|-------------------------------|-----------------------------|---------------------|---------------------------------------|---------------------------------------|------------------------------|-------------|
| 14 $\mu\text{g mL}^{-1}$      | 30.5                        | 67.2 $\pm$ 9.7      | 64 $\pm$ 4.3                          | 7.3 $\pm$ 0.2                         | 230.4 $\pm$ 4.5              | 49.7        |
| 40 $\mu\text{g mL}^{-1}$      | 35.1                        | 114.4 $\pm$ 16.2    | 37 $\pm$ 2.1                          | 11.9 $\pm$ 0.2                        | 133.2 $\pm$ 3.2              | 64.4        |
| 60 $\mu\text{g mL}^{-1}$      | 39.4                        | 176.5 $\pm$ 16.5    | 24 $\pm$ 1.1                          | 16.2 $\pm$ 0.2                        | 86.4 $\pm$ 2.7               | 63.4        |
| 80 $\mu\text{g mL}^{-1}$      | 43.3                        | 223.4 $\pm$ 14.9    | 19 $\pm$ 0.9                          | 20.1 $\pm$ 0.2                        | 68.4 $\pm$ 1.5               | 65.7        |
| $\alpha$ -Ti6Al4V/ $p$ -AgNPs | 32.3                        | 94.1 $\pm$ 9.3      | 1.73                                  | 6.9 $\pm$ 0.2                         | 0.346                        | 35.1        |

**Table 2ESI.** Minimum bactericidal concentration (MBC) and minimum inhibitory concentration (MIC) for the different synthesized Ag-NPs.

| Ag-NPs                      | <i>Staphylococcus aureus</i> / CFU mL <sup>-1</sup> |                 |                 |                 |                 |
|-----------------------------|-----------------------------------------------------|-----------------|-----------------|-----------------|-----------------|
|                             | 10 <sup>2</sup>                                     | 10 <sup>3</sup> | 10 <sup>4</sup> | 10 <sup>5</sup> | 10 <sup>6</sup> |
| MIC / $\mu\text{g mL}^{-1}$ |                                                     |                 |                 |                 |                 |
| Spherical-shaped            | 25                                                  | 25              | 25              | 25              | 50              |
| Prism- shaped               | 3.1                                                 | 3.1             | 3.1             | 6.5             | 50              |
| MBC / $\mu\text{g mL}^{-1}$ |                                                     |                 |                 |                 |                 |
| Spherical-shaped            | $\geq 25$                                           | $\geq 25$       | $\geq 25$       | $\geq 25$       | $\geq 50$       |
| Prism- shaped               | $\geq 3.1$                                          | $\geq 3.1$      | $\geq 3.1$      | $\geq 12.5$     | $\geq 50$       |

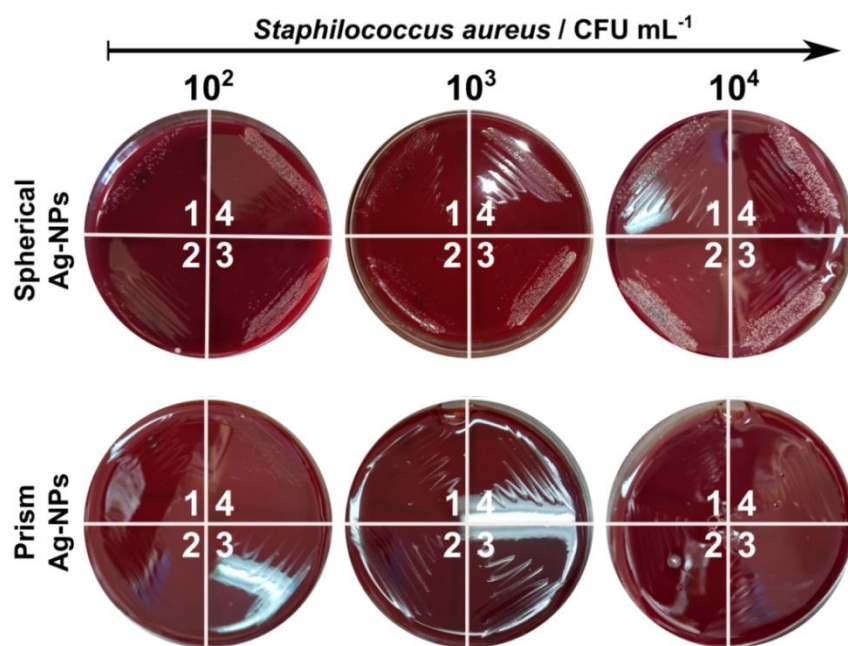

**Figure 11ESI.** AgNPs of different shape effect on *Staphylococcus aureus* viability. Representative images of *Staphylococcus aureus* colonies on blood agar platelets. *Staphylococcus aureus* with different bacteria concentrations ( $10^2$  -  $10^4$  CFU mL<sup>-1</sup>) were treated without spherical and prims-shaped Ag-NPS with different concentrations: (1) 25  $\mu\text{g mL}^{-1}$ ; (2) 12.5  $\mu\text{g mL}^{-1}$ ; (3) 6.2  $\mu\text{g mL}^{-1}$  and (4) 3.1  $\mu\text{g mL}^{-1}$

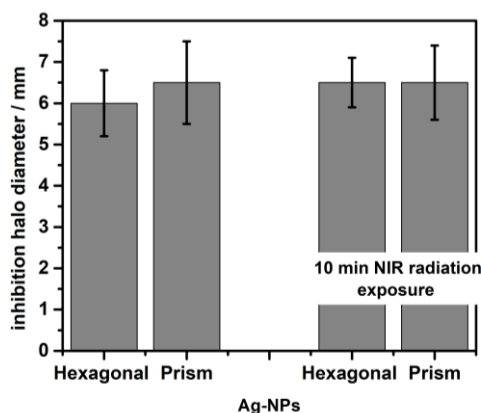

**Figure 12ESI.** Bacterial inhibition performed after exposing Ag-NPs to 10 minutes of NIR radiation. Statistical analysis was performed among different materials,  $n = 4$ ,  $*p < 0.05$ ; significant differences between the samples are indicated with brackets.

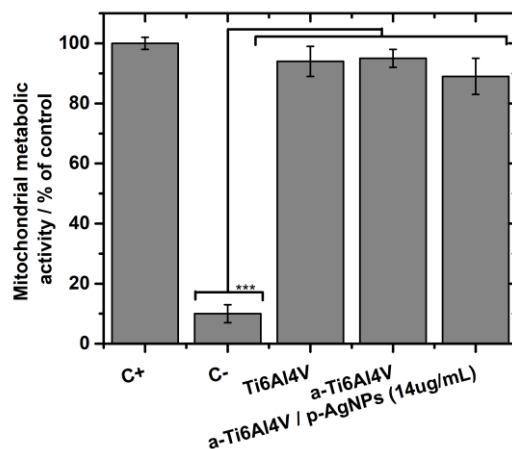

**Figure 13ESI.** Mitochondrial metabolic activity of preosteoblast MC3T3-E1 cells. Statistical analysis was performed among different materials,  $n = 4$ ,  $*p < 0.05$ ; significant differences between the samples are indicated with brackets. Wells containing cells but no substrates were used as positive control (C+) and wells containing a-Ti6Al4V/p-AgNPs substrates with medium but without cells were used as negative controls (C-). Mitochondrial metabolic activity (%) =  $(OD_{570} / OD_{570, C+}) \times 100$ .

## References

1. N. Hassan, V. Verdinelli, J. M. Ruso and P. V. Messina, *Langmuir*, 2011, **27**, 8905-8912.
2. F. Belén, A. N. Gravina, M. F. Pistonesi, J. M. Ruso, N. A. García, F. D. Prado and P. V. Messina, *ACS Appl. Mater. Interfaces*, 2022, **14**, 5843-5855.
